# Supplementary material for: Comorbidity burden in the first three years after diagnosis in patients with rheumatoid arthritis, psoriatic arthritis or spondyloarthritis: a general practice registry-based study
Source: HighWire-hosted journal article supplement (doi:10.1136/rmdopen-2021-001671), 2021-06-01
Supplement: rmdopen-2021-001671supp001_data_supplement.pdf [file rmdopen-2021-001671supp001_data_supplement.pdf]

| Comorbid condition  | Included codes                                                                                                                                                                                                                                                                                                                                                                                                                                                                                                                                                                                                                                                                                                                                                                                                                                                                                                                                                                                                                                                                                                                                                                                                                                                                                                                                                                                                                                                                                                                    | Excluded codes                                                                                                                                                                                                                                                                                                                                                                                                                                                                                                                                                                                                                                                                                                                                                                                                                                                                                                                                                                                                                                           |
|---------------------|-----------------------------------------------------------------------------------------------------------------------------------------------------------------------------------------------------------------------------------------------------------------------------------------------------------------------------------------------------------------------------------------------------------------------------------------------------------------------------------------------------------------------------------------------------------------------------------------------------------------------------------------------------------------------------------------------------------------------------------------------------------------------------------------------------------------------------------------------------------------------------------------------------------------------------------------------------------------------------------------------------------------------------------------------------------------------------------------------------------------------------------------------------------------------------------------------------------------------------------------------------------------------------------------------------------------------------------------------------------------------------------------------------------------------------------------------------------------------------------------------------------------------------------|----------------------------------------------------------------------------------------------------------------------------------------------------------------------------------------------------------------------------------------------------------------------------------------------------------------------------------------------------------------------------------------------------------------------------------------------------------------------------------------------------------------------------------------------------------------------------------------------------------------------------------------------------------------------------------------------------------------------------------------------------------------------------------------------------------------------------------------------------------------------------------------------------------------------------------------------------------------------------------------------------------------------------------------------------------|
| <b>LUNG DISEASE</b> | <p><b>CHRONIC OBSTRUCTIVE PULMONARY DISEASE AND ALLIED CONDITIONS (490-496)</b><br/>           490 Bronchitis, not specified as acute or chronic<br/>           491 Chronic bronchitis<br/>           492 Emphysema<br/>           493 Asthma<br/>               Excludes:<br/>               wheezing NOS (786.07)<br/>           494 Bronchiectasis<br/>               Bronchiectasis (fusiform) (postinfectious) (recurrent)<br/>               Bronchiolectasis<br/>               Excludes:<br/>               congenital (748.61)<br/>               tuberculous bronchiectasis (current disease) (011.5)<br/>           495 Extrinsic allergic alveolitis<br/>           496 Chronic airway obstruction, not elsewhere classified<br/>               Chronic:<br/>               nonspecific lung disease<br/>               obstructive lung disease<br/>               obstructive pulmonary disease [COPD] NOS</p> <p><b>PNEUMOCONIOSES AND OTHER LUNG DISEASES DUE TO EXTERNAL AGENTS (500-508)</b><br/>           500 Coal workers' pneumoconiosis<br/>           501 Asbestosis<br/>           502 Pneumoconiosis due to other silica or silicates<br/>           503 Pneumoconiosis due to other inorganic dust<br/>           504 Pneumonopathy due to inhalation of other dust<br/>           505 Pneumoconiosis, unspecified</p> <p><b>OTHER DISEASES OF RESPIRATORY SYSTEM (510-519)</b><br/>           515 Postinflammatory pulmonary fibrosis<br/>               Cirrhosis of lung chronic or unspecified</p> | <p><b>ACUTE RESPIRATORY INFECTIONS (460-466)</b><br/>           460 Acute nasopharyngitis [common cold]<br/>           461 Acute sinusitis<br/>           462 Acute pharyngitis<br/>           463 Acute tonsillitis<br/>           464 Acute laryngitis and tracheitis<br/>           465 Acute upper respiratory infections of multiple or unspecified sites<br/>           466 Acute bronchitis and bronchiolitis</p> <p><b>OTHER DISEASES OF THE UPPER RESPIRATORY TRACT (470-478)</b></p> <p><b>PNEUMONIA AND INFLUENZA (480-488)</b><br/>           480 Viral pneumonia<br/>           481 Pneumococcal pneumonia [Streptococcus pneumoniae pneumonia]<br/>           482 Other bacterial pneumonia<br/>           483 Pneumonia due to other specified organism<br/>           484 Pneumonia in infectious diseases classified<br/>           485 Bronchopneumonia, organism unspecified<br/>           486 Pneumonia, organism unspecified<br/>           487 Influenza<br/>           488 Influenza due to identified avian influenza virus</p> |

|  |                                                                                                                                                                                                                                                                                                                                                                                                                                                  |  |
|--|--------------------------------------------------------------------------------------------------------------------------------------------------------------------------------------------------------------------------------------------------------------------------------------------------------------------------------------------------------------------------------------------------------------------------------------------------|--|
|  | <p>Fibrosis of lung (atrophic) (confluent) (massive) (perialveolar) (peribronchial) chronic or unspecified</p> <p>Induration of lung chronic or unspecified</p> <p>516 Other alveolar and parietoalveolar pneumonopathy</p> <p>517 Lung involvement in conditions classified elsewhere</p> <p>714.81 Rheumatoid lung</p> <p>Caplan's syndrome</p> <p>Diffuse interstitial rheumatoid disease of lung</p> <p>Fibrosing alveolitis, rheumatoid</p> |  |
|--|--------------------------------------------------------------------------------------------------------------------------------------------------------------------------------------------------------------------------------------------------------------------------------------------------------------------------------------------------------------------------------------------------------------------------------------------------|--|

|                              |                                                                                                                                                                                                                                                                                                                                                                                                                                                                                                                                                                                                                                                                                                                                                                                                                                                                                                                                                                                                                                                |  |
|------------------------------|------------------------------------------------------------------------------------------------------------------------------------------------------------------------------------------------------------------------------------------------------------------------------------------------------------------------------------------------------------------------------------------------------------------------------------------------------------------------------------------------------------------------------------------------------------------------------------------------------------------------------------------------------------------------------------------------------------------------------------------------------------------------------------------------------------------------------------------------------------------------------------------------------------------------------------------------------------------------------------------------------------------------------------------------|--|
| <b>MYOCARDIAL INFARCTION</b> | <p>410 Acute myocardial infarction</p> <p>Includes:</p> <p>cardiac infarction</p> <p>coronary (artery):</p> <p>embolism</p> <p>occlusion</p> <p>rupture</p> <p>thrombosis</p> <p>infarction of heart, myocardium, or ventricle</p> <p>rupture of heart, myocardium, or ventricle</p> <p>ST elevation (STEMI) and non-ST elevation (NSTEMI) myocardial infarction</p> <p>any condition classifiable to 414.1-414.9 specified as acute or with a stated duration of 8 weeks or less</p> <p>The following fifth-digit subclassification is for use with category 410:</p> <p>0 episode of care unspecified</p> <p>Use when the source document does not contain sufficient information for the assignment of fifth-digit 1 or 2.</p> <p>1 initial episode of care</p> <p>Use fifth-digit 1 to designate the first episode of care (regardless of facility site) for a newly diagnosed myocardial infarction. The fifth-digit 1 is assigned regardless of the number of times a patient may be transferred during the initial episode of care.</p> |  |
|------------------------------|------------------------------------------------------------------------------------------------------------------------------------------------------------------------------------------------------------------------------------------------------------------------------------------------------------------------------------------------------------------------------------------------------------------------------------------------------------------------------------------------------------------------------------------------------------------------------------------------------------------------------------------------------------------------------------------------------------------------------------------------------------------------------------------------------------------------------------------------------------------------------------------------------------------------------------------------------------------------------------------------------------------------------------------------|--|

|                                 |                                                                                                                                                                                                                                                                                                                                                                                                                                                                                                                                                                                         |  |
|---------------------------------|-----------------------------------------------------------------------------------------------------------------------------------------------------------------------------------------------------------------------------------------------------------------------------------------------------------------------------------------------------------------------------------------------------------------------------------------------------------------------------------------------------------------------------------------------------------------------------------------|--|
|                                 | <p>2 subsequent episode of care<br/>Use fifth-digit 2 to designate an episode of care following the initial episode when the patient is admitted for further observation, evaluation or treatment for a myocardial infarction that has received initial treatment, but is still less than 8 weeks old.</p> <p>411 Other acute and subacute forms of ischemic heart disease<br/>eicd10<br/>412 Old myocardial infarction<br/>Healed myocardial infarction<br/>Past myocardial infarction diagnosed on ECG [EKG] or other special investigation, but currently presenting no symptoms</p> |  |
| <b>STROKE</b>                   | <p>430 Subarachnoid haemorrhage<br/>431 Intracerebral hemorrhage<br/>433 Occlusion and stenosis of precerebral arteries<br/>434 Occlusion of cerebral arteries<br/>435 Transient cerebral ischemia<br/>997.02 Iatrogenic cerebrovascular infarction or hemorrhage<br/>Postoperative stroke</p>                                                                                                                                                                                                                                                                                          |  |
| <b>OTHER<br/>CARDIOVASCULAR</b> | <p>394 Diseases of mitral valve<br/>395 Diseases of aortic valve<br/>396 Diseases of mitral and aortic valves<br/>402 Hypertensive heart disease<br/>404 Hypertensive heart and chronic kidney disease<br/>413 Angina pectoris<br/>414 Other forms of chronic ischemic heart disease<br/>424 Other diseases of endocardium<br/>425 Cardiomyopathy<br/>426 Conduction disorders<br/>427 Cardiac dysrhythmias<br/>428 Heart failure</p>                                                                                                                                                   |  |
| <b>HYPERTENSION</b>             | <p>401 Essential hypertension<br/>Includes:</p>                                                                                                                                                                                                                                                                                                                                                                                                                                                                                                                                         |  |

|                                        |                                                                                                                                                                                                                                                                                                                                                                                                                                                                                                                                                                                                                                                                                                                                             |  |
|----------------------------------------|---------------------------------------------------------------------------------------------------------------------------------------------------------------------------------------------------------------------------------------------------------------------------------------------------------------------------------------------------------------------------------------------------------------------------------------------------------------------------------------------------------------------------------------------------------------------------------------------------------------------------------------------------------------------------------------------------------------------------------------------|--|
|                                        | <p>high blood pressure<br/> hyperpiesia<br/> hyperpiesis<br/> hypertension (arterial) (essential) (primary) (systemic)<br/> hypertensive vascular:<br/> degeneration<br/> disease<br/> Excludes:<br/> elevated blood pressure without diagnosis of hypertension (796.2)<br/> pulmonary hypertension (416.0-416.9)<br/> that involving vessels of:<br/> brain (430-438)<br/> eye (362.11)</p> <p>405 Secondary hypertension</p>                                                                                                                                                                                                                                                                                                              |  |
| <b>FRACTURE SPINE,<br/>HIP, OR LEG</b> | <p>733.13 Pathologic fracture of vertebrae<br/> Collapse of vertebra NOS<br/> 733.14 Pathologic fracture of neck of femur<br/> Femur NOS<br/> Hip NOS<br/> 733.15 Pathologic fracture of other specified part of femur<br/> 733.16 Pathologic fracture of tibia and fibula<br/> Ankle NOS<br/> 733.93 Stress fracture of tibia or fibula<br/> Stress reaction of tibia or fibula<br/> 733.96 Stress fracture of femoral neck<br/> Stress reaction of femoral neck<br/> 733.97 Stress fracture of shaft of femur<br/> Stress reaction of shaft of femur<br/> 733.98 Stress fracture of pelvis<br/> Stress reaction of pelvis<br/> 805 Fracture of vertebral column without mention of spinal cord injury<br/> Includes:<br/> neural arch</p> |  |

|  |                                                                                                                                                                                                                                                                                                                                                                                                                                                                                                                                                                                                                                                                                                                                                                                                                                                                                                                                                                                          |  |
|--|------------------------------------------------------------------------------------------------------------------------------------------------------------------------------------------------------------------------------------------------------------------------------------------------------------------------------------------------------------------------------------------------------------------------------------------------------------------------------------------------------------------------------------------------------------------------------------------------------------------------------------------------------------------------------------------------------------------------------------------------------------------------------------------------------------------------------------------------------------------------------------------------------------------------------------------------------------------------------------------|--|
|  | <p>spine<br/> spinous process<br/> transverse process<br/> vertebra</p> <p>806 Fracture of vertebral column with spinal cord injury<br/> Includes:<br/> any condition classifiable to 805 with:<br/> complete or incomplete transverse lesion (of cord)<br/> hematomyelia<br/> injury to:<br/> cauda equina<br/> nerve<br/> paralysis<br/> paraplegia<br/> quadriplegia<br/> spinal concussion</p> <p>808 Fracture of pelvis</p> <p>820 Fracture of neck of femur</p> <p>821 Fracture of other and unspecified parts of femur</p> <p>823 Fracture of tibia and fibula<br/> Excludes:<br/> Dupuytren's fracture (824.4-824.5)<br/> ankle (824.4-824.5)<br/> radius (813.42, 813.52)<br/> Pott's fracture (824.4-824.5)<br/> that involving ankle (824.0-824.9)</p> <p>827 Other, multiple, and ill-defined fractures of lower limb<br/> Includes:<br/> leg NOS<br/> multiple bones of same lower limb<br/> Excludes:<br/> multiple fractures of:<br/> ankle bones alone (824.4-824.9)</p> |  |
|--|------------------------------------------------------------------------------------------------------------------------------------------------------------------------------------------------------------------------------------------------------------------------------------------------------------------------------------------------------------------------------------------------------------------------------------------------------------------------------------------------------------------------------------------------------------------------------------------------------------------------------------------------------------------------------------------------------------------------------------------------------------------------------------------------------------------------------------------------------------------------------------------------------------------------------------------------------------------------------------------|--|

|                   |                                                                                                                                                                                                                                                                                                                                                                                                                                                                                                                                                                                                                                                                                                                                                                                                                                                                                                                                                                                                                                                                                                                                                                                                                                                                                       |                                                                                                                                                                                                                                                                              |
|-------------------|---------------------------------------------------------------------------------------------------------------------------------------------------------------------------------------------------------------------------------------------------------------------------------------------------------------------------------------------------------------------------------------------------------------------------------------------------------------------------------------------------------------------------------------------------------------------------------------------------------------------------------------------------------------------------------------------------------------------------------------------------------------------------------------------------------------------------------------------------------------------------------------------------------------------------------------------------------------------------------------------------------------------------------------------------------------------------------------------------------------------------------------------------------------------------------------------------------------------------------------------------------------------------------------|------------------------------------------------------------------------------------------------------------------------------------------------------------------------------------------------------------------------------------------------------------------------------|
|                   | <p>phalanges of foot alone (826.0-826.1)<br/> tarsal with metatarsal bones (825.29, 825.39)<br/> tibia with fibula (823.0-823.9 with fifth-digit 2)</p>                                                                                                                                                                                                                                                                                                                                                                                                                                                                                                                                                                                                                                                                                                                                                                                                                                                                                                                                                                                                                                                                                                                               |                                                                                                                                                                                                                                                                              |
| <b>DEPRESSION</b> | <p>296.2 Major depressive disorder, single episode<br/> Depressive psychosis, single episode or unspecified<br/> Endogenous depression, single episode or unspecified<br/> Involutional melancholia, single episode or unspecified<br/> Manic-depressive psychosis or reaction, depressed type, single episode or unspecified<br/> Monopolar depression, single episode or unspecified<br/> Psychotic depression, single episode or unspecified<br/> Excludes:<br/> circular type, if previous attack was of manic type (296.5)<br/> depression NOS (311)<br/> reactive depression (neurotic) (300.4)<br/> psychotic (298.0)</p> <p>296.3 Major depressive disorder, recurrent episode<br/> Any condition classifiable to 296.2, stated to be recurrent<br/> Excludes:<br/> circular type, if previous attack was of manic type (296.5)<br/> depression NOS (311)<br/> reactive depression (neurotic) (300.4)<br/> psychotic (298.0)</p> <p>300.4 Dysthymic disorder<br/> Anxiety depression<br/> Depression with anxiety<br/> Depressive reaction<br/> Neurotic depressive state<br/> Reactive depression<br/> Excludes:<br/> adjustment reaction with depressive symptoms (309.0-309.1)<br/> depression NOS (311)<br/> manic-depressive psychosis, depressed type (296.2-296.3)</p> | <p>PSYCHOSES (290-299)<br/> ORGANIC PSYCHOTIC CONDITIONS (290-294)<br/> NEUROTIC DISORDERS, PERSONALITY DISORDERS,<br/> AND OTHER NONPSYCHOTIC MENTAL DISORDERS<br/> (300-316)<br/> MENTAL RETARDATION (317-319)<br/> 300 Anxiety, dissociative and somatoform disorders</p> |

|                          |                                                                                                                                                                                                                                                                                                                                                                                                                                                                                                                                                                                                                                                                                                                                                                                                                       |  |
|--------------------------|-----------------------------------------------------------------------------------------------------------------------------------------------------------------------------------------------------------------------------------------------------------------------------------------------------------------------------------------------------------------------------------------------------------------------------------------------------------------------------------------------------------------------------------------------------------------------------------------------------------------------------------------------------------------------------------------------------------------------------------------------------------------------------------------------------------------------|--|
|                          | <p>reactive depressive psychosis (298.0)</p> <p>311 Depressive disorder, not elsewhere classified</p> <p>Depressive disorder NOS</p> <p>Depressive state NOS</p> <p>Depression NOS</p> <p>Excludes:</p> <p>acute reaction to major stress with depressive symptoms (308.0)</p> <p>affective personality disorder (301.10-301.13)</p> <p>affective psychoses (296.0-296.9)</p> <p>brief depressive reaction (309.0)</p> <p>depressive states associated with stressful events (309.0-309.1)</p> <p>disturbance of emotions specific to childhood and adolescence, with misery and unhappiness (313.1)</p> <p>mixed adjustment reaction with depressive symptoms (309.4)</p> <p>neurotic depression (300.4)</p> <p>prolonged depressive adjustment reaction (309.1)</p> <p>psychogenic depressive psychosis (298.0)</p> |  |
| <b>DIABETES MELLITUS</b> | <p>249 Secondary diabetes mellitus</p> <p>Includes:</p> <p>diabetes mellitus (due to) (in) (secondary) (with):</p> <p>drug-induced or chemical induced</p> <p>infection</p> <p>Excludes:</p> <p>gestational diabetes (648.8)</p> <p>hyperglycemia NOS (790.29)</p> <p>neonatal diabetes mellitus (775.1)</p> <p>nonclinical diabetes (790.29)</p> <p>Type I diabetes - see category 250</p> <p>Type II diabetes - see category 250</p> <p>250 Diabetes mellitus</p> <p>Excludes:</p> <p>gestational diabetes (648.8)</p> <p>hyperglycemia NOS (790.29)</p>                                                                                                                                                                                                                                                            |  |

|                                 |                                                                                                                                                                                                                                                                                                                                                                                                                                                                                                                                                                                                                                          |                                                                                                                                                                                                                                                                                                                                                                                                                                                                                                                                                                                                                                                                                                                                                      |
|---------------------------------|------------------------------------------------------------------------------------------------------------------------------------------------------------------------------------------------------------------------------------------------------------------------------------------------------------------------------------------------------------------------------------------------------------------------------------------------------------------------------------------------------------------------------------------------------------------------------------------------------------------------------------------|------------------------------------------------------------------------------------------------------------------------------------------------------------------------------------------------------------------------------------------------------------------------------------------------------------------------------------------------------------------------------------------------------------------------------------------------------------------------------------------------------------------------------------------------------------------------------------------------------------------------------------------------------------------------------------------------------------------------------------------------------|
|                                 | neonatal diabetes mellitus (775.1)<br>nonclinical diabetes (790.29)<br>secondary diabetes (249.0-249.9)                                                                                                                                                                                                                                                                                                                                                                                                                                                                                                                                  |                                                                                                                                                                                                                                                                                                                                                                                                                                                                                                                                                                                                                                                                                                                                                      |
| <b>ULCER OR STOMACH PROBLEM</b> | 531 Gastric ulcer<br>532 Duodenal ulcer<br>533 Peptic ulcer, site unspecified<br>534 Gastrojejunal ulcer<br>535 Gastritis and duodenitis<br>536.3 Gastroparesis<br>536.8 Dyspepsia and other specified disorders of function of stomach<br>Achyilia gastrica<br>Hourglass contraction of stomach<br>Hyperacidity<br>Hyperchlorhydria<br>Hypochlorhydria<br>Indigestion<br>Tachygastria<br>Excludes:<br>achlorhydria (536.0)<br>heartburn (787.1)<br>536.9 Unspecified functional disorder of stomach<br>Functional gastrointestinal:<br>disorder<br>disturbance<br>irritation<br>578.9 Hemorrhage of gastrointestinal tract, unspecified | 530 Diseases of esophagus<br>536.0 Achlorhydria<br>536.1 Acute dilatation of stomach<br>536.2 Persistent vomiting<br>Cyclical vomiting<br>Habit vomiting<br>Persistent vomiting [not of pregnancy]<br>Uncontrollable vomiting<br>536.4 Gastrostomy complications<br>536.40 Gastrostomy complication, unspecified<br>536.41 Infection of gastrostomy abscess or cellulitis of abdomen (682.2) septicemia (038.0-038.9)<br>536.42 Mechanical complication of gastrostom<br>536.49 Other gastrostomy complications<br>562.00 Diverticulosis of small intestine (without mention of hemorrhage)<br>Diverticulosis:<br>duodenum without mention of diverticulitis<br>ileum without mention of diverticulitis<br>jejunum without mention of diverticulitis |
| <b>CANCER</b>                   | MALIGNANT NEOPLASM OF LIP, ORAL CAVITY, AND PHARYNX (140-149)<br>Excludes:<br>carcinoma in situ (230.0)<br>MALIGNANT NEOPLASM OF DIGESTIVE ORGANS AND PERITONEUM (150-159)<br>Excludes:<br>carcinoma in situ (230.1-230.9)<br>MALIGNANT NEOPLASM OF RESPIRATORY AND INTRATHORACIC ORGANS (160-165)                                                                                                                                                                                                                                                                                                                                       |                                                                                                                                                                                                                                                                                                                                                                                                                                                                                                                                                                                                                                                                                                                                                      |



|  |                                                                                                                                                                                                                                                                                                                                                                                                                                                                                                                                                              |  |
|--|--------------------------------------------------------------------------------------------------------------------------------------------------------------------------------------------------------------------------------------------------------------------------------------------------------------------------------------------------------------------------------------------------------------------------------------------------------------------------------------------------------------------------------------------------------------|--|
|  | <p>Excludes:<br/>carcinoma in situ (231.0-231.9)<br/>MALIGNANT NEOPLASM OF BONE, CONNECTIVE TISSUE, SKIN, AND BREAST (170-176)</p> <p>Excludes:<br/>carcinoma in situ:<br/>breast (233.0)<br/>skin (232.0-232.9)<br/>MALIGNANT NEOPLASM OF GENITOURINARY ORGANS (179-189)</p> <p>Excludes:<br/>carcinoma in situ (233.1-233.9)<br/>MALIGNANT NEOPLASM OF OTHER AND UNSPECIFIED SITES (190-199)</p> <p>Excludes:<br/>carcinoma in situ (234.0-234.9)<br/>MALIGNANT NEOPLASM OF LYMPHATIC AND HEMATOPOIETIC TISSUE (200-208)<br/>209 Neuroendocrine tumors</p> |  |
|--|--------------------------------------------------------------------------------------------------------------------------------------------------------------------------------------------------------------------------------------------------------------------------------------------------------------------------------------------------------------------------------------------------------------------------------------------------------------------------------------------------------------------------------------------------------------|--|
